# Supplementary material
Source: PubMed Central journal article supplement (PMC3048127)
Supplement: 1016201108_pnas.201016201SI.pdf [file 1016201108_pnas.201016201SI.pdf]

# Supporting Information

Beyer et al. 10.1073/pnas.1016201108

## SI Materials and Methods

**Cell Culture, Transfection, and Drug Treatment.** GH, NCCIT, H1299, and U2OS cells were maintained in Dulbecco's Modified Eagle medium and HCT116 cells in McCoy's medium, supplemented with 10% FBS. Cisplatin and Trichostatin A (dissolved in DMSO; Sigma) were added as indicated, with corresponding DMSO alone added to controls. Transfection of siRNAs was performed using HiPerFect (Qiagen). In experiments involving siRNA transfection and drug treatment, cells were first transfected, incubated for 36 h, and then treated with the drug.

**Amplification of Genomic DNA.** Genomic DNA isolated from human cells or diverse ape species was PCR-amplified with Taq polymerase (Fermentas; initial denaturation 3 min at 95 °C, 35 cycles of 15 s at 95 °C, 15 s at 59 °C, and 20 s at 72 °C). PCR products were analyzed by agarose gel electrophoresis. Primers are listed in [Table S1](#).

**Quantitative Analysis by Reverse-Transcription PCR.** Total RNA was isolated using TRIzol (Invitrogen), followed by reverse transcription with Moloney Murine Leukemia Virus reverse transcriptase (New England Biolabs) and a mixture of oligo-dT and random nonamer primers. IQ SYBR Green Supermix (Bio-Rad) was used for real-time PCR. The primer sequences are listed in [Table S1](#). PCR conditions were 2 min at 95 °C, followed by 40 cycles of 95 °C for 15 s, 59 °C for 20 s, and 72 °C for 40 s. Gene expression levels were normalized to GAPDH or 36B4 as reference genes and calculated using the  $2^{-\Delta\Delta C_t}$  method.

**RACE.** The 5' RACE experiments were performed using the Rapid cDNA Amplification Kit (Clontech). In brief, 1 µg of total RNA was transcribed by using the 5' CDS primer and the SMART oligo (Clontech), resulting in cDNAs with the SMART oligo sequence at the 5' end of the cDNA. Amplification of cDNAs was performed with the 5'-UPM forward primer (Clontech) and a p63-specific reverse primer ([Table S1](#)). To enrich for specific RACE fragments, the PCR products were reamplified using the UPM forward primer and the nested p63 specific reverse primer. Purified RACE fragments were cloned into the pCR4-TOPO vector (Invitrogen) and sequenced. Sequence alignments were done with the ClustalW algorithms (1) ([www.ch.embnet.org/software/ClustalW.html](http://www.ch.embnet.org/software/ClustalW.html)).

**Immunoblot Analysis.** After separation by SDS/PAGE, proteins were transferred to nitrocellulose, followed by overnight incubation with antibodies diluted in PBS containing 5% dried milk and 0.1% Tween 20. Antibodies were mouse anti-p63 (4A4; Santa Cruz), mouse anti-β-actin (ab6225; Abcam), mouse anti-lamin B1 (33-2000, ZYMED), rabbit anti-Cox IV (ab16056; Abcam) and rabbit anti-GFP (A11122; Invitrogen). Primary antibodies were detected by peroxidase-coupled secondary antibodies (Jackson immunoresearch) and chemiluminescence (Pierce).

**Clonogenic Assays.** H1299 cells were transfected using Lipofectamine (Invitrogen), reseeded at equal cell numbers after 24 h, and maintained for 7 to 10 d with geneticin (800 µg/mL), followed by Crystal violet staining. Plates were scanned and the blue pixel rate was determined using Adobe Photoshop 9.

**Isolation of Mitochondria.** Twenty-four hours after treatment of H1299 cells with 30 µM cisplatin, cells were harvested by scraping. Cell pellets were washed in TD buffer (135 mM NaCl, 5 mM KCl, 25 mM Tris-HCl, pH 7.6). Cell membranes were disrupted by swelling in CaRSB buffer (10 mM NaCl, 1.5 mM CaCl<sub>2</sub>, 10 mM Tris-HCl, pH 7.5) and dounce homogenization, followed by resuspension in MS buffer (210 mM mannitol, 70 mM sucrose, 5 mM EDTA, 5 mM Tris-HCl, pH 7.6). After centrifugation, the supernatant was loaded on a discontinuous sucrose gradient (1–1.5 M sucrose). Upon ultracentrifugation at 86,000 × *g*, the mitochondria fraction was aspirated from the interphase of the sucrose gradient. Washing of mitochondria in MS buffer was followed by pelleting at 16,000 × *g* for 15 min and resuspension in MS buffer. Purified mitochondria together with control crude cell lysates were analyzed by immunoblots.

**Cell Cycle Analysis.** Attached cells were harvested and combined with floating cells. Cells were fixed overnight in 70% ethanol at –20 °C, and resuspended in PBS containing 1 mg/mL RNase A. Propidium iodide was added to the samples at a final concentration of 30 µg/mL, followed by analysis of fluorescence signals with the Guava EasyCyte flow cytometry system (Millipore). Cell cycle analysis was carried out by the ModFit software. Detection of active caspase 3 and 7 in apoptotic cells was performed by staining with sulforhodamine-coupled caspase inhibitor DEVD (Guava caspase 3/7 SR kit; Millipore) and analysis of fluorescence by Guava EasyCyte; 7-AAD was used to stain cells that had undergone late apoptosis or necrosis and therefore had disrupted membranes.

**Immunohistochemistry of Testicular Tissue.** Paraffin-embedded tissue sections (5 µm) of normal human testis and testicular cancers were obtained from the archives of the Department of Pathology of Stony Brook University Hospital in accordance with all Internal Review Board and federal regulations and subjected to standard immunohistochemistry. For antigen retrieval, sections were boiled for 5 min in 10 mM citrate buffer, followed by blocking of endogenous peroxidase with 10% goat serum. Sections were incubated overnight at 4 °C with different p63 antibodies (polyclonal 9424 raised against human p63, from ThermoFisher Sci. and monoclonal 4A4 raised against mouse p63 from SantaCruz Biotechnology), followed by secondary biotinylated anti-mouse or anti-rabbit antibodies and streptavidin-peroxidase/3,3'-diaminobenzidine detection.

1. Thompson JD, Higgins DG, Gibson TJ (1994) CLUSTAL W: Improving the sensitivity of progressive multiple sequence alignment through sequence weighting, positionspecific gap penalties and weight matrix choice. *Nucleic Acids Res* 22:4673–4680.

**a** Sequence GTAp63

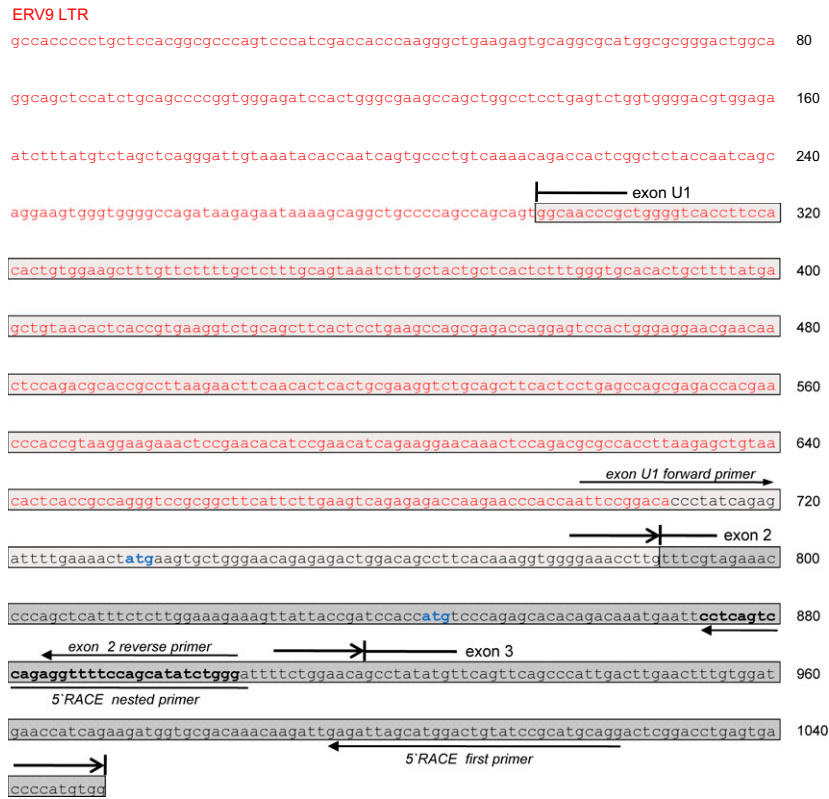

**Sequence exon U2**

aaattgtgcttttatgacttctgatgatcagtaaccaaatcaacaaggcacaatttgtgaatctatgtctgaaagaga 80

ggttcagcaacagctgtcttatgggctcaaaactaaccaagggaaag

**Sequence exon U3**

gcatccaatcacgacagagatcagaagttcagagatgcctccagctccaaattgccaaacaagtggtgactatacgt 80

caaggactctgaaagcgtgagagagggggaagaaacaacagtagagaggatgccagctg

**Fig. S1.** (Continued)





**h**

|                |                                                                   |                    |                    |                    |                    |                    |      |
|----------------|-------------------------------------------------------------------|--------------------|--------------------|--------------------|--------------------|--------------------|------|
| Homo sapiens   | ..... .....  .....                                                | ..... .....  ..... | ..... .....  ..... | ..... .....  ..... | ..... .....  ..... | ..... .....  ..... | 60   |
| Hylobates lar  | TTGGGCATAT CCAGGACTAG AAATCCATAA GAAAACAGTA GATTGGAAAC TGA AACACT |                    |                    |                    |                    |                    |      |
| Macaca mulatta | TTGGGCATAT CCAGGACTAG AAATCCATAA GAAAACAGTA GATTGGAAAC TGA AACACT |                    |                    |                    |                    |                    |      |
| Homo sapiens   | ATTGAGAGGT GACAGCGTGC TGGCAGTCCT CACAGCCCTC GCTCGCTCTG GGC        |                    |                    |                    |                    |                    | 120  |
| Hylobates lar  | -----                                                             | -----              | -----              | -----              | -----              | -----              |      |
| Macaca mulatta | -----                                                             | -----              | -----              | -----              | -----              | -----              |      |
| Homo sapiens   | CTGCCTGGGC TCCCACTTTG GTGGCACTTG AGGAGCCCTT CAGCCCACTG CTGCACTGTG |                    |                    |                    |                    |                    | 180  |
| Hylobates lar  | -----                                                             | -----              | -----              | -----              | -----              | -----              |      |
| Macaca mulatta | -----                                                             | -----              | -----              | -----              | -----              | -----              |      |
| Homo sapiens   | GGAGCCTCTT CTGGGCTGGC CAAGGCCGGA GCCCGCTCCC TCAGCTTGCA GGGAGGTGTG |                    |                    |                    |                    |                    | 240  |
| Hylobates lar  | -----                                                             | -----              | -----              | -----              | -----              | -----              |      |
| Macaca mulatta | -----                                                             | -----              | -----              | -----              | -----              | -----              |      |
| Homo sapiens   | GAAAGAGAGG TGGGAGCGGG AACTGGGGCT GCGCGCGGCG CTTCGGGCC AGTGGAGTT   |                    |                    |                    |                    |                    | 300  |
| Hylobates lar  | -----                                                             | -----              | -----              | -----              | -----              | -----              |      |
| Macaca mulatta | -----                                                             | -----              | -----              | -----              | -----              | -----              |      |
| Homo sapiens   | CCGGGTGGGC GTGGGCTTGG CGGGCTCTGC ACTCGGAACA GCCGGCCGGC CCCCGCGGC  |                    |                    |                    |                    |                    | 360  |
| Hylobates lar  | -----                                                             | -----              | -----              | -----              | -----              | -----              |      |
| Macaca mulatta | -----                                                             | -----              | -----              | -----              | -----              | -----              |      |
| Homo sapiens   | CCAGGCAATG AGGGGCTTAG CACCCGGGCC AGCAGCTGTG GAGGGTGTAC TGGTCCCCC  |                    |                    |                    |                    |                    | 420  |
| Hylobates lar  | -----                                                             | -----              | -----              | -----              | -----              | -----              |      |
| Macaca mulatta | -----                                                             | -----              | -----              | -----              | -----              | -----              |      |
| Homo sapiens   | AGCAGTGCCA GCCCACCAGC GCTGCGCTCG ATTTCTCACC GGGCCTTAGC TGCCTCCCC  |                    |                    |                    |                    |                    | 480  |
| Hylobates lar  | -----                                                             | -----              | -----              | -----              | -----              | -----              |      |
| Macaca mulatta | -----                                                             | -----              | -----              | -----              | -----              | -----              |      |
| Homo sapiens   | TGGGGCAGGG CTCGGGACCT GCAGCCCGCC ATGCCTGAGC CTCCACCCG CTCTGTGGGC  |                    |                    |                    |                    |                    | 540  |
| Hylobates lar  | -----                                                             | -----              | -----              | -----              | -----              | -----              |      |
| Macaca mulatta | -----                                                             | -----              | -----              | -----              | -----              | -----              |      |
| Homo sapiens   | TCCTGTGTGG CCGGAGCCTC CTCGACAAGC GCCACCCCTT GCTCCACGGC GCCAGTCCC  |                    |                    |                    |                    |                    | 600  |
| Hylobates lar  | -----                                                             | -----              | -----              | -----              | -----              | -----              |      |
| Macaca mulatta | -----                                                             | -----              | -----              | -----              | -----              | -----              |      |
| Homo sapiens   | ATCGACCACC CAAGGGCTGA AGAGTGCAGG CGCATGGCGC GGGACTGGCA GGCAGCTCCA |                    |                    |                    |                    |                    | 660  |
| Hylobates lar  | -----                                                             | -----              | -----              | -----              | -----              | -----              |      |
| Macaca mulatta | -----                                                             | -----              | -----              | -----              | -----              | -----              |      |
| Homo sapiens   | TCTGCAGCCC CGGTGGGAGA TCCACTGGGC GAAGCCAGCT GGCCTCCTGA GTCTGGTGG  |                    |                    |                    |                    |                    | 720  |
| Hylobates lar  | -----                                                             | -----              | -----              | -----              | -----              | -----              |      |
| Macaca mulatta | -----                                                             | -----              | -----              | -----              | -----              | -----              |      |
| Homo sapiens   | GACGTGGAGA ATCTTTATGT CTAGCTCAGG GATTGTAAAT ACACCAATCA GTGCCCTGTC |                    |                    |                    |                    |                    | 780  |
| Hylobates lar  | -----                                                             | -----              | -----              | -----              | -----              | -----              |      |
| Macaca mulatta | -----                                                             | -----              | -----              | -----              | -----              | -----              |      |
| Homo sapiens   | AAAACAGACC ACTCGGCTCT ACCAATCAGC AGGAAGTGGG TGGGGCCAGA TAAGAGAATA |                    |                    |                    |                    |                    | 840  |
| Hylobates lar  | -----                                                             | -----              | -----              | -----              | -----              | -----              |      |
| Macaca mulatta | -----                                                             | -----              | -----              | -----              | -----              | -----              |      |
| Homo sapiens   | AAAGCAGGCT GCCCAGCCA GCAGTGCCAA CCCGCTGGGG TCACCTTCCA CACTGTGGAA  |                    |                    |                    |                    |                    | 900  |
| Hylobates lar  | -----                                                             | -----              | -----              | -----              | -----              | -----              |      |
| Macaca mulatta | -----                                                             | -----              | -----              | -----              | -----              | -----              |      |
| Homo sapiens   | GCTTTGTCT TTTGCTCTT GCAGTAAATC TTGCTACTGC TCACTCTTG GGTGCACACT    |                    |                    |                    |                    |                    | 960  |
| Hylobates lar  | -----                                                             | -----              | -----              | -----              | -----              | -----              |      |
| Macaca mulatta | -----                                                             | -----              | -----              | -----              | -----              | -----              |      |
| Homo sapiens   | GCTTTTATGA GCTGTAACAC TCACCGTGAA GGTCTGCAGC TTCACTCCTG AAGCCAGCGA |                    |                    |                    |                    |                    | 1020 |
| Hylobates lar  | -----                                                             | -----              | -----              | -----              | -----              | -----              |      |
| Macaca mulatta | -----                                                             | -----              | -----              | -----              | -----              | -----              |      |

Fig. S1. (Continued)

|                |            |            |            |            |             |            |      |
|----------------|------------|------------|------------|------------|-------------|------------|------|
| Homo sapiens   | GACCAGGAGT | CCACTGGGAG | GAACGAACAA | CTCCAGACGC | ACCGCCTTAA  | GAACTTCAAC | 1080 |
| Hylobates lar  | -----      | -----      | -----      | -----      | -----       | -----      |      |
| Macaca mulatta | -----      | -----      | -----      | -----      | -----       | -----      |      |
| Homo sapiens   | ACTCACTGCG | AAGGTCTGCA | GTTTCACTCC | TGAGCCAGCG | AGACCACGAA  | CCCACCGTAA | 1140 |
| Hylobates lar  | -----      | -----      | -----      | -----      | -----       | -----      |      |
| Macaca mulatta | -----      | -----      | -----      | -----      | -----       | -----      |      |
| Homo sapiens   | GGAAGAAACT | CCGAACACAT | CCGAACATCA | GAAGGAACAA | ACTCCAGACG  | CGCCACCTTA | 1200 |
| Hylobates lar  | -----      | -----      | -----      | -----      | -----       | -----      |      |
| Macaca mulatta | -----      | -----      | -----      | -----      | -----       | -----      |      |
| Homo sapiens   | AGAGCTGTAA | CACTCACCGC | CAGGGTCCGC | GGCTTCATTC | TTGAAGTCAG  | AGAGACCAAG | 1260 |
| Hylobates lar  | -----      | -----      | -----      | -----      | -----       | -----      |      |
| Macaca mulatta | -----      | -----      | -----      | -----      | -----       | -----      |      |
| Homo sapiens   | AACCCACCAA | TTCCGGACAC | CCTATCAGAG | ATTTTGAAAA | CTATGAAGTG  | CTGGGAACAG | 1320 |
| Hylobates lar  | -----      | -----      | ---ATCAGAG | ATTTTAAAAA | CTGTGAGGTG  | CTGGGAACAG |      |
| Macaca mulatta | -----      | -----      | ---GTCAGAG | ATTTTAAAAA | CTATGAAGTG  | CTAGAAAAAG |      |
| Homo sapiens   | AGAGACTGGA | C--AGCCTT  | CACAAAGGTG | GGGAAACCTT | GTAAGTACT   | CAG--TTTTC | 1380 |
| Hylobates lar  | AGAGACTGGA | GTTGAAGCTT | CACAAAGGTG | GGGAAACCTT | GGTAAACTACT | CAGAGTTTTC |      |
| Macaca mulatta | AGAAATTGGA | GTTGAAGCTT | CACAAAGGCG | GGGAAACCTT | GGTAAACTACT | CAGAGTTTTC |      |
| Homo sapiens   | AGTTGAAACC | CAAGAAGATA | AAAATCTAAA | GGACCATGCA | TTAAGAGTAA  | G          |      |
| Hylobates lar  | AGTTGAGATC | CAAGAGGATA | AAAATCTAAA | GGACCATGCA | TTAAGAGTAA  | G          |      |
| Macaca mulatta | AGCTGAGACC | CAAGAGGATA | AAAATCTAAA | GGACCATGCA | TTAAGAGTAA  | G          |      |

**Fig. S1.** Sequence and expression of GTAp63. (A) (Upper) The recently identified p63 exon U1 together with known exons 2 and 3 constitutes the major 5' end of GTAp63 mRNA. Primer binding sites for RACE and subsequent PCR analysis are indicated. The sequence corresponding to the endogenous retrovirus 9 (ERV9) LTR, as well as the translational start codons (ATG), are shown in red. Sequences corresponding to exons are framed. (Lower) Transcripts of minor abundance contain either exons U2 or U3 (mutually exclusive), inserted between exons U1 and exon 2. (B) Translation of GTAp63 mRNA predominantly starts at the first ATG initiation codon. Full-length mRNA of GTAp63 $\alpha$ , including all known 5' and 3' UTRs, was cloned into pcDNA3 and expressed in H1299 cells, followed by p63 immunoblot analysis with the monoclonal antibody 4A4. The long GTAp63 is the predominant product (lane 2). Within this wild-type GTAp63, each ATG was separately mutated to CTG. Mutating the first ATG eliminated the normal pattern, generating instead an aberrant "escape" Tap63 product in abundance (lane 3); its size is easier to estimate on the shorter exposure. In contrast, mutating the second ATG retained the pattern of a predominant upper GTAp63 band (lane 4). Thus, the first ATG codon is predominantly used to generate the GTAp63 protein. A minor translation product results from the use of the second ATG, generating TAp63 (C). The pcDNA3 containing conventional p63 starting with exon 1 was used as control. It generates TA\*p63 and TAp63 (lane 5). Coexpressed GFP and Ponceau S staining were used as loading controls. (C) Comparative mRNA expression of conventional TAp63 and GTAp63. H1299 cells were transiently transfected with the same plasmid backbone encoding one of the indicated p63 full-length mRNAs under the same conditions. RT-PCR analysis of mRNA levels, normalized to GAPDH. Mean and SE from three independent experiments are shown for both. The level of conventional TAp63 $\alpha$  was set to 1. *P* values were calculated using the two-sided Student's *t* test. (D) Similar stability of conventional TAp63 and GTAp63 proteins. H1299 cells were transfected as in C, followed by treatment for the indicated periods of time with a general inhibitor of translation, cycloheximide. The p63 was detected by immunoblot analysis (mAb 4A4). No gross difference in protein stability was observed between conventional TAp63 and GTAp63. Note that longer exposures were used for conventional TAp63 to compensate for its lower expression levels, but this did not affect the relative signal intensities obtained after cycloheximide chase. (E) The mRNA levels of GTAp63 and conventional TAp63 in testes and ovaries from human donors of various ages were determined by RT-PCR, as in D. Although some GTAp63 was detected in ovaries from a young donor, GTAp63 levels were far lower in ovaries than in testes. In contrast, the levels of conventional TAp63 were comparable. Because the preparation of isolated human primordial and primary oocytes (which are the ones selectively expressing TAp63) in amounts sufficient for RNA analysis is incompatible with ethical standards, we had to restrict our further analysis to total human ovaries. Whereas conventional TAp63 mRNA levels were comparable between testis and ovary, GTAp63 mRNA levels were far lower than in testis, at least suggesting that the expression of GTAp63 is biased toward the male germ line. (F) The ERV9 LTR upstream of human *TP63* in comparison with other ERV9 LTRs. ERV9 left a trace of > 100 provirus-like copies and at least 4,000 solitary LTRs in the human genome (1). Sequence comparison by the ClustalW algorithm reveals that the TP63-associated ERV9 LTR belongs to the subfamily IX of ERV9 (2), strongly suggesting that its insertion occurred less than 18.7 million years ago. (Left) A depiction of the evolutionary distances of ERV9 subfamilies. (Right) Association of individual members of subfamily IX, including the LTR upstream of *TP63*. The sequence names within refer to a previous assembly of ERV9 LTR sequences (2). The sequence alignments are provided in Table S2. (G) (Left) PCR amplification from genomic DNA of exon U1, comprising the ERV9 LTR and GTAp63 sequences, yields a specific product in *Hominidae* but not in other primates. Primers "LTR forward" and "LTR reverse" were used (Table S1). In contrast, exon 2 was successfully amplified from all primates. (Right) Primers spanning the LTR insertion site ("upstream LTR forward" and "downstream LTR reverse") amplified the entire LTR with flanking sequences from genomic DNA of *Homo sapiens* (lane 1). In contrast, they amplified only the acceptor region without the LTR from nonhominid primates (lanes 2 and 3). Sequence alignments of the PCR products are shown in H. (H) PCR-amplification revealed the presence or absence of a LTR upstream of *TP63* (Fig. 2B). The sequences of the PCR products amplified from different primates are shown. The LTR sequence is marked in red.

- López-Sánchez P, Costas JC, Naveira HF (2005) Paleogenomic record of the extinction of human endogenous retrovirus ERV9. *J Virol* 79:6997–7004.
- Costas J, Naveira H (2000) Evolutionary history of the human endogenous retrovirus family ERV9. *Mol Biol Evol* 17:320–330.

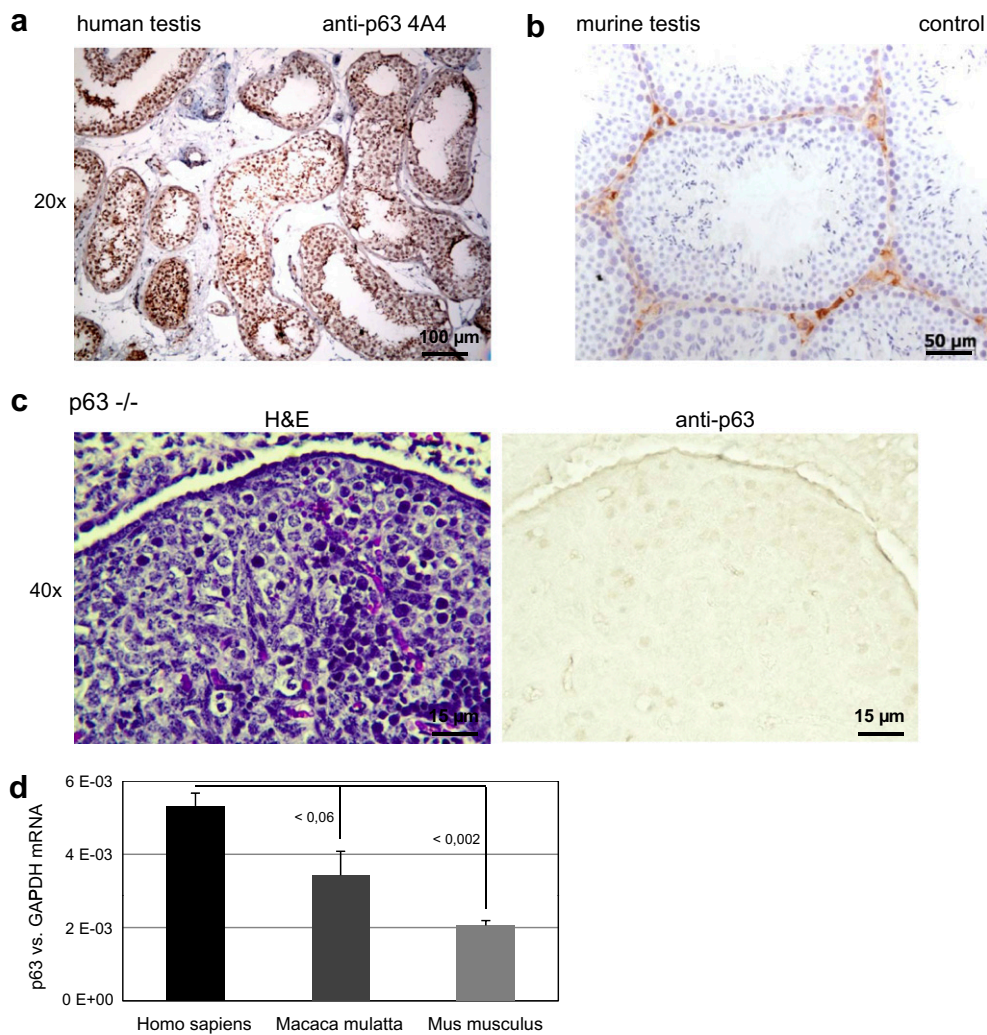

**Fig. S2.** Immunostaining of p63 in testis. (A) Expression of p63 in human testis, detected by monoclonal antibody 4A4. Expression of p63 in the basal and suprabasal layers of germ-cell precursors within seminiferous tubules. This pattern was seen in more detail on a higher magnification (Fig. 2C). It is identical to the pattern detected with the polyclonal p63 antibody 9424, shown in Fig. 2B. (B) No staining is seen when the first antibody is omitted. (C) Specificity control. Staining is not detected with 4A4 antibody in the testis of E17 mouse embryos carrying a targeted deletion of the *Trp63* gene. (Left) Corresponding H&E. (D) The mRNA levels encoding transactivating p63 (corresponding to exon 2 and exon 3) in the testis of humans, mice, and Rhesus macaques, as determined by qRT-PCR. The p63 mRNA was increased two- to threefold in human testis relative to murine or simian testis. Note that in addition to this moderate global increase, there is also a difference in relative cellular distribution within the spermatogenic epithelium between human and mouse, as shown in Fig. 2 B–D.









**Table S1. Primers used for PCR**

[Table S1](#)

**Table S2. Sequence comparison of ERV9 LTRs with exon U1 of TP63**

[Table S2](#)

**Table S3. Alignment of TP63 exon U1 from different species within the family of *Hominidae* (humans and great apes)**

[Table S3](#)
